# Supplementary material
Source: PubMed Central journal article supplement (PMC3405619)
Supplement: supp_50.7.2203_JCM-JCM00718-12-s01.pdf [file supp_50.7.2203_JCM-JCM00718-12-s01.pdf]

1 Supplementary Table S1: *Mycobacterium tuberculosis complex* isolates used in this study

| Species                                 | Strain   | Country of Isolation | Origin <sup>a</sup>   | Remark                       |
|-----------------------------------------|----------|----------------------|-----------------------|------------------------------|
| <i>M. tuberculosis</i>                  | 22       | Mongolia             | RIVM                  | Beijing lineage              |
| <i>M. tuberculosis</i>                  | 53       | Argentina            | RIVM                  | Haarlem lineage              |
| <i>M. tuberculosis</i>                  | 112      | The Netherlands      | RIVM                  | CAS lineage                  |
| <i>M. tuberculosis</i>                  | 67       | Comoro Islands       | RIVM                  | EAI lineage                  |
| <i>M. tuberculosis</i>                  | 41       | Chile                | RIVM                  | LAM lineage                  |
| <i>M. tuberculosis</i>                  | 103      | China                | RIVM                  | T-family lineage             |
| <i>M. tuberculosis</i>                  | 12594_02 | Former Soviet Union  | Borstel               | Beijing lineage              |
| <i>M. tuberculosis</i>                  | 1500_03  | Former Soviet Union  | Borstel               | Beijing lineage              |
| <i>M. tuberculosis</i>                  | 1934_03  | Former Soviet Union  | Borstel               | Beijing lineage              |
| <i>M. tuberculosis</i>                  | 1428_02  | Ghana                | Borstel               | Cameroon lineage             |
| <i>M. tuberculosis</i>                  | 5390_02  | Ghana                | Borstel               | Cameroon lineage             |
| <i>M. tuberculosis</i>                  | 5400_02  | Ghana                | Borstel               | Cameroon lineage             |
| <i>M. tuberculosis</i>                  | 2637_02  | Germany              | Borstel               | Delhi/CAS lineage            |
| <i>M. tuberculosis</i>                  | 7936_01  | Germany              | Borstel               | Delhi/CAS lineage            |
| <i>M. tuberculosis</i>                  | 1797_03  | Germany              | Borstel               | EAI lineage                  |
| <i>M. tuberculosis</i>                  | 4850_03  | Germany              | Borstel               | EAI lineage                  |
| <i>M. tuberculosis</i>                  | 947_01   | Germany              | Borstel               | EAI lineage                  |
| <i>M. tuberculosis</i>                  | 2336_02  | Germany              | Borstel               | Haarlem lineage              |
| <i>M. tuberculosis</i>                  | 9532_03  | Germany              | Borstel               | Haarlem lineage              |
| <i>M. tuberculosis</i>                  | 7968_03  | Germany              | Borstel               | LAM lineage                  |
| <i>M. tuberculosis</i>                  | 8885_03  | Germany              | Borstel               | LAM lineage                  |
| <i>M. tuberculosis</i>                  | 946_03   | Germany              | Borstel               | LAM lineage                  |
| <i>M. tuberculosis</i>                  | 2151_03  | Germany              | Borstel               | S-type lineage               |
| <i>M. tuberculosis</i>                  | 2318_06  | Germany              | Borstel               | S-type lineage               |
| <i>M. tuberculosis</i>                  | 10469_01 | NA <sup>c</sup>      | Borstel               | Ghana lineage                |
| <i>M. tuberculosis</i>                  | 10493_01 | NA <sup>c</sup>      | Borstel               | Ghana lineage                |
| <i>M. tuberculosis</i>                  | 2570_02  | NA <sup>c</sup>      | Borstel               | Ghana lineage                |
| <i>M. tuberculosis</i>                  | 2201_99  | Uganda               | Borstel               | Uganda I lineage             |
| <i>M. tuberculosis</i>                  | 2333_99  | Uganda               | Borstel               | Uganda I lineage             |
| <i>M. tuberculosis</i>                  | 2176_99  | Uganda               | Borstel               | Uganda II lineage            |
| <i>M. tuberculosis</i>                  | 2191_99  | Uganda               | Borstel               | Uganda II lineage            |
| <i>M. tuberculosis</i>                  | 4412_04  | Germany              | Borstel               | X-type lineage               |
| <i>M. tuberculosis</i>                  | 9953_04  | Germany              | Borstel               | X-type lineage               |
| <i>M. tuberculosis</i>                  | 11313_03 | Germany              | Borstel               | Tur lineage                  |
| <i>M. tuberculosis</i>                  | 1657_03  | Germany              | Borstel               | Ural lineage                 |
| <i>M. tuberculosis</i>                  | 10264_03 | Germany              | Borstel               | Tur lineage                  |
| <i>M. tuberculosis</i>                  | 10529_03 | Germany              | Borstel               | Tur lineage                  |
| <i>M. tuberculosis</i>                  | 8431_03  | Germany              | Borstel               | Ural lineage                 |
| <i>M. tuberculosis</i>                  | 3493_07  |                      | Borstel               | Hamburg lineage              |
| <i>M. tuberculosis</i>                  | 10707_07 |                      | Borstel               | Hamburg lineage              |
| <i>M. tuberculosis</i>                  | 9679_00  | NA <sup>c</sup>      | Borstel               | Laboratory strain ATCC H37Rv |
| <i>M. tuberculosis</i><br>(19 clinical) | -        | NA <sup>c</sup>      | Mario<br>Vaneechoutte | Clinical isolates            |

|                     |                        |                 |              |                                                                                                                 |
|---------------------|------------------------|-----------------|--------------|-----------------------------------------------------------------------------------------------------------------|
| <i>isolates)</i>    |                        |                 |              |                                                                                                                 |
| <i>M. canettii</i>  | 116                    | Somalia         | RIVM         | Smooth growing strain described by van Soolingen <i>et al.</i> 1997                                             |
| <i>M. canettii</i>  | 1997-1549              | Switzerland     | RIVM         | Swiss isolate described in Pfyffer <i>et al.</i> 1998                                                           |
| <i>M. canettii</i>  | NLA000701671           | Somalia         | RIVM         | Characterised on the basis of their spoligotype, IS6110 RFLP type and smooth growth as                          |
| <i>M. canettii</i>  | NLA000200937           | Eritrea         | RIVM         | Characterised on the basis of their spoligotype, IS6110 RFLP type and smooth growth                             |
| <i>M. canettii</i>  | 1996-46                | France          | RIVM         | Canetti strain                                                                                                  |
| <i>M. canettii</i>  | 3040_99                | The Netherlands | Borstel      |                                                                                                                 |
| <i>M. canettii</i>  | 3151_08                | NA <sup>c</sup> | Borstel      |                                                                                                                 |
| <i>M. canettii</i>  | 3041_99                | The Netherlands | Borstel      |                                                                                                                 |
| <i>M. bovis</i>     | 117                    | Argentina       | RIVM         | See Kremer <i>et al.</i> 2005                                                                                   |
| <i>M. bovis</i>     | 126                    | Argentina       | RIVM         | See Kremer <i>et al.</i> 2005                                                                                   |
| <i>M. bovis</i>     | 73                     | The Netherlands | RIVM         | See Kremer <i>et al.</i> 2005                                                                                   |
| <i>M. bovis</i>     | 130                    | The Netherlands | RIVM         | See Kremer <i>et al.</i> 2005                                                                                   |
| <i>M. bovis</i>     | 24                     | Saudi Arabia    | RIVM         | Isolated from an oryx, Antelope clade, see also Smith <i>et al.</i> 2006                                        |
| <i>M. bovis</i>     | 4258_00                | Germany         | Borstel      |                                                                                                                 |
| <i>M. bovis</i>     | 751_01                 | Germany         | Borstel      |                                                                                                                 |
| <i>M. bovis</i>     | 7540_01                | Germany         | Borstel      |                                                                                                                 |
| <i>M. bovis</i>     | -                      | NA <sup>c</sup> | Mario        | Clinical isolates                                                                                               |
| (6 isolates)        |                        |                 | Vaneechoutte |                                                                                                                 |
| <i>M. bovis</i> BCG | 48 (2)                 | The Netherlands | RIVM         | See Kremer <i>et al.</i> 2005                                                                                   |
| <i>M. bovis</i> BCG | 71                     | Japan           | RIVM         | See Kremer <i>et al.</i> 2005                                                                                   |
| <i>M. bovis</i> BCG | 83                     | Russia          | RIVM         | See Kremer <i>et al.</i> 2005                                                                                   |
| <i>M. bovis</i> BCG | 2008-714 <sup>b</sup>  | NA <sup>c</sup> | RIVM         | Identified on basis of characteristic IS6110/IS1081 RFLP patterns according to van Soolingen <i>et al.</i> 1992 |
| <i>M. bovis</i> BCG | 2008-1601 <sup>b</sup> | NA <sup>c</sup> | RIVM         | Identified on basis of characteristic IS6110/IS1081 RFLP patterns according to van Soolingen <i>et al.</i> 1992 |
| <i>M. bovis</i> BCG | DSM 43990              | NA <sup>c</sup> | DSMZ         | <i>Mycobacterium bovis</i> Karlson and Lessel 1970<br>BCG, Chicago 1                                            |
| <i>M. bovis</i> BCG | DSM 45071              | NA <sup>c</sup> | DSMZ         | <i>Mycobacterium bovis</i> Karlson and Lessel 1970                                                              |
| <i>M. caprae</i>    | 2006-1960 <sup>b</sup> | The Netherlands | RIVM         | Characterised using Hain genotype MTBC kit                                                                      |
| <i>M. caprae</i>    | 2007-0039 <sup>b</sup> | The Netherlands | RIVM         | Characterised using Hain genotype MTBC kit                                                                      |
| <i>M. caprae</i>    | 1694_00                | Germany         | Borstel      |                                                                                                                 |
| <i>M. caprae</i>    | 8986_99                | Germany         | Borstel      |                                                                                                                 |
| <i>M. caprae</i>    | 9577_99                | Germany         | Borstel      |                                                                                                                 |
| <i>M. microti</i>   | 62                     | United Kingdom  | RIVM         | see van Soolingen <i>et al.</i> 1998                                                                            |
| <i>M. microti</i>   | 25                     | United Kingdom  | RIVM         | see van Soolingen <i>et al.</i> 1998                                                                            |

|                      |                        |                 |         |                                      |
|----------------------|------------------------|-----------------|---------|--------------------------------------|
| <i>M. microti</i>    | 15274 <sup>b</sup>     | United Kingdom  | RIVM    | see van Soolingen <i>et al.</i> 1998 |
| <i>M. microti</i>    | 15912 <sup>b</sup>     | Belgium         | RIVM    | see van Soolingen <i>et al.</i> 1998 |
| <i>M. microti</i>    | 15911 <sup>b</sup>     | Netherlands     | RIVM    | see van Soolingen <i>et al.</i> 1998 |
| <i>M. microti</i>    | 417/01                 | Germany         |         | Llama lineage                        |
| <i>M. pinnipedii</i> | 76                     | Argentina       | RIVM    | See Kremer <i>et al.</i> 2005        |
| <i>M. pinnipedii</i> | 81                     | Argentina       | RIVM    | See Kremer <i>et al.</i> 2005        |
| <i>M. pinnipedii</i> | 101                    | Argentina       | RIVM    | See Kremer <i>et al.</i> 2005        |
| <i>M. pinnipedii</i> | 7011_02                | Germany         | Borstel |                                      |
| <i>M. pinnipedii</i> | 7739_01                | Germany         | Borstel |                                      |
| <i>M. africanum</i>  | 6                      | The Netherlands | RIVM    | <i>M. africanum</i> clade 2          |
| <i>M. africanum</i>  | 128 (85)               | The Netherlands | RIVM    | <i>M. africanum</i> clade 2          |
| <i>M. africanum</i>  | 2007-1386 <sup>b</sup> | The Netherlands | RIVM    | <i>M. africanum</i> clade 2          |
| <i>M. africanum</i>  | 2007-1154 <sup>b</sup> | The Netherlands | RIVM    | <i>M. africanum</i> clade 2          |
| <i>M. africanum</i>  | 2007-1073 <sup>b</sup> | The Netherlands | RIVM    | <i>M. africanum</i> clade 2          |
| <i>M. africanum</i>  | 1449_02                | Ghana           | Borstel | <i>M. africanum</i> clade 1          |
| <i>M. africanum</i>  | 1473_02                | Ghana           | Borstel | <i>M. africanum</i> clade 1          |
| <i>M. africanum</i>  | 10473_01               | Ghana           | Borstel | <i>M. africanum</i> clade 1          |
| <i>M. africanum</i>  | 10494_01               | Ghana           | Borstel | <i>M. africanum</i> clade 1          |
| <i>M. africanum</i>  | 1443_02                | Ghana           | Borstel | <i>M. africanum</i> clade 1          |
| <i>M. africanum</i>  | 10476_01               | Ghana           | Borstel | <i>M. africanum</i> clade 2          |
| <i>M. africanum</i>  | 10514_01               | Ghana           | Borstel | <i>M. africanum</i> clade 2          |
| <i>M. africanum</i>  | 5468_02                | Ghana           | Borstel | <i>M. africanum</i> clade 2          |
| <i>M. africanum</i>  | 9550_99                | Ghana           | Borstel | <i>M. africanum</i> clade 2 ATCC     |

<sup>a</sup> RIVM = National Tuberculosis Reference Laboratory, National Institute for Public Health and the Environment, Bilthoven, The Netherlands; \*Borstel = National Reference Center for Mycobacteria, Forschungszentrum Borstel, Germany; \*DSM = The German Collection of Microorganisms

<sup>b</sup> Represent RIVM strains not previously described in literature, however have been characterised to the species level using techniques outlined in references supplied in the manuscript.

<sup>c</sup> This information was not available (NA) for this study.

Supplementary Table S2: Non *tuberculosis* mycobacteria and other strains of bacteria used in this study

| Non <i>tuberculosis</i> mycobacteria                  | Strain designation <sup>a</sup> | Remark                                  |
|-------------------------------------------------------|---------------------------------|-----------------------------------------|
| <i>Mycobacterium aichiense</i>                        | DSM 44147                       | Type strain, isolated from soil         |
| <i>Mycobacterium alvei</i>                            | DSM 44176                       | Type strain, isolated from water sample |
| <i>Mycobacterium arupense</i>                         | DSM 44942                       | Type strain, isolated from a tendon     |
| <i>Mycobacterium asiaticum</i>                        | ITG 8182                        | See De Baere <i>et al.</i> 2002         |
| <i>Mycobacterium avium</i>                            | ITG 7886                        | See Vaneechoutte <i>et al.</i> 1993     |
| <i>Mycobacterium boenickei</i>                        | DSM 44677                       | Type strain, isolated from a leg wound  |
| <i>Mycobacterium branderi</i>                         | DSM 44624                       | Type strain, isolated from human sputum |
| <i>Mycobacterium brisbanense</i>                      | DSM 44680                       | Type strain, isolated from a sinus      |
| <i>Mycobacterium brumae</i>                           | DSM 44177                       | Type strain, isolated from water sample |
| <i>Mycobacterium canariense</i>                       | DSM 44828                       | Type strain, isolated from human blood  |
| <i>Mycobacterium celatum</i>                          | ITG 6147                        | See De Baere <i>et al.</i> 2002         |
| <i>Mycobacterium chelonae</i>                         | ITG 4975                        | NA <sup>b</sup>                         |
| <i>Mycobacterium chelonae</i> subsp. <i>abscessus</i> | DSM 44196                       | Type strain                             |
| <i>Mycobacterium confluentis</i>                      | DSM 44017                       | Type strain, isolated from human sputum |

2  
3  
4  
5  
6  
7  
8  
9  
10

|                                       |                           |                                                                             |
|---------------------------------------|---------------------------|-----------------------------------------------------------------------------|
| <i>Mycobacterium conspicuum</i>       | DSM 44136                 | Type strain, isolated from patient with disseminated infection              |
| <i>Mycobacterium flavescens</i>       | VUB A016                  | See De Baere <i>et al.</i> 2002                                             |
| <i>Mycobacterium fortuitum</i>        | ITG 8020                  | See Vaneechoutte <i>et al.</i> 1993                                         |
| <i>Mycobacterium genavense</i>        | ITG 97-102                | See De Baere <i>et al.</i> 2002                                             |
| <i>Mycobacterium gilvum</i>           | DSM 9487                  | Isolated from soil                                                          |
| <i>Mycobacterium goodii</i>           | DSM 44492                 | Type strain                                                                 |
| <i>Mycobacterium gordonae</i>         | ITG 7704                  | See Vaneechoutte <i>et al.</i> 1993                                         |
| <i>Mycobacterium heckeshornense</i>   | DSM 44428                 | Type strain, isolated from human respiratory tract                          |
| <i>Mycobacterium houstonense</i>      | DSM 44676                 | Type strain, isolated from a facial abscess                                 |
| <i>Mycobacterium intracellulare</i>   | DSM 43223                 | Type strain                                                                 |
| <i>Mycobacterium kansasii</i>         | ITG 7727                  | See Vaneechoutte <i>et al.</i> 1993                                         |
| <i>Mycobacterium kubicaiae</i>        | DSM 44627                 | Type strain, isolated from human sputum                                     |
| <i>Mycobacterium lacus</i>            | DSM 44577                 | Type strain, isolated from human elbow                                      |
| <i>Mycobacterium mageritense</i>      | DSM 44476                 | Type strain, isolated from human sputum                                     |
| <i>Mycobacterium malmoense</i>        | ITG 940611                | See De Baere <i>et al.</i> 2002                                             |
| <i>Mycobacterium marinum</i>          | ITG 1727                  | See Vaneechoutte <i>et al.</i> 1993                                         |
| <i>Mycobacterium massiliense</i>      | DSM 45103                 | Type strain, isolated from human blood                                      |
| <i>Mycobacterium moriokaense</i>      | DSM 44221                 | Type strain, isolated from soil                                             |
| <i>Mycobacterium mucogenicum</i>      | DSM 44625                 | Type strain, isolated from human cyst                                       |
| <i>Mycobacterium nebraskense</i>      | DSM 44803                 | Type strain, isolated from human sputum                                     |
| <i>Mycobacterium neworleansense</i>   | DSM 44679                 | Type strain, isolated from human scalp                                      |
| <i>Mycobacterium paratuberculosis</i> | ITG 2666                  | See De Baere <i>et al.</i> 2002                                             |
| <i>Mycobacterium scrofulaceum</i>     | DSM 43992                 | Type strain, isolated from human cervical lymph node                        |
| <i>Mycobacterium shimoidei</i>        | DSM 44152                 | Type strain, isolated from sputum of patient with tuberculosis-like disease |
| <i>Mycobacterium simiae</i>           | ITG 4485                  | See Vaneechoutte <i>et al.</i> 1993                                         |
| <i>Mycobacterium smegmatis</i>        | DSM 43756                 | Type strain                                                                 |
| <i>Mycobacterium szulgai</i>          | ITG 4979                  | NA <sup>b</sup>                                                             |
| <i>Mycobacterium tusciae</i>          | DSM 44338                 | Type strain, isolated from human cervical lymph node                        |
| <i>Mycobacterium ulcerans</i>         | ITG 96-1439               | NA <sup>b</sup>                                                             |
| <i>Mycobacterium xenopi</i>           | ITG 4986                  | See De Baere <i>et al.</i> 2002                                             |
| <b>Other bacteria</b>                 | <b>Strain designation</b> | <b>Remark</b>                                                               |
| <i>Staphylococcus aureus</i>          | DSM 20231                 | Type strain, isolated from human pleural fluid                              |
| <i>Listeria monocytogenes</i>         | DSM 20600                 | Type strain, isolated from a rabbit                                         |
| <i>Escherichia coli</i>               | DSM 301                   | Disinfectant test strain                                                    |
| <i>Klebsiella oxytoca</i>             | ATCC 43086                | NA <sup>b</sup>                                                             |
| <i>Enterococcus faecalis</i>          | DSM 20371                 | Isolated from pleural fluid                                                 |
| <i>Proteus mirabilis</i>              | DSM 4479                  | Type strain                                                                 |

|                                  |                  |                                                                        |
|----------------------------------|------------------|------------------------------------------------------------------------|
| <i>Bacillus cereus</i>           | DSM 31           | Type strain                                                            |
| <i>Bordetella pertussis</i>      | CCUG 13475       | Isolated from patient suffering from whooping cough                    |
| <i>Streptococcus agalactiae</i>  | DSM 2134         | Type strain                                                            |
| <i>Rhodococcus equi</i>          | DSM 20307        | Type strain, isolated from lung abscess of foal                        |
| <i>Streptomyces albidoflavus</i> | DSM 40455        | Type strain                                                            |
| <i>Nocardioides sp.</i>          | DSM 17401        | Proposed type strain, isolated from marine sediment                    |
| <i>Nocardia salmonicida</i>      | DSM 40472        | Type strain, isolated from blueback salmon                             |
| <i>Nocardia asiatica</i>         | clinical isolate | Isolated from human wound, see Wauters <i>et al.</i> 2005              |
| <i>Nocardia nova</i>             | clinical isolate | Isolated from human abscess, see Wauters <i>et al.</i> 2005            |
| <i>Nocardia cyriacigeorgica</i>  | clinical isolate | Isolated from human bronchial aspirate, see Wauters <i>et al.</i> 2005 |
| <i>Nocardia farcinica</i>        | clinical isolate | Isolated from human abscess, see Wauters <i>et al.</i> 2005            |

<sup>a</sup> DSM = The German Collection of Microorganisms; \*ITG = Institute of Tropical Medicine, Antwerp; \*VUB = Department of Microbiology, Academic Hospital of the Free University of Brussels, Brussels, Belgium Germany; \*ATCC = American Type Culture Collection; \*CCUG = Culture Collection, University of Göteborg, Sweden.

<sup>b</sup>This information was not available (NA) for this study.

Supplementary Table S3: Oligonucleotide primers and probes used in this study

| Name                        | Function                                                          | Sequence 5'→3'                      |
|-----------------------------|-------------------------------------------------------------------|-------------------------------------|
| MTC_Fw                      | Forward Sequencing primer, forward MTC real-time PCR assay primer | AGACCGTGCGGATCTTG                   |
| MTC_Rv                      | Reverse Sequencing primer, Reverse MTC real-time PCR assay primer | CATGGAGATCACCCGTGA                  |
| MTC Probe                   | MTC probe                                                         | HEX-ATTGGTCACCCGGATTTCCGGT-BHQ1     |
| <i>wbb11</i> _Fw            | Forward sequencing primer, Forward real-time PCR assay primer     | TACCAGCTTCAGTTCCGT                  |
| <i>wbb11</i> _Rv            | Reverse sequencing primer, Reverse real-time PCR assay primer     | GCACCTATATCTTCTTAGCCG               |
| <i>wbb11</i> probe          | <i>wbb11</i> probe                                                | FAM-ATGGTGCGCAGTTCCTGC              |
| <i>M. canetti</i> sp Fw     | Forward <i>M. canetti</i> specific primer                         | ATGTGGTTTCAGTACGACTTC               |
| <i>M. canetti</i> sp Rv     | Reverse <i>M. canetti</i> specific primer                         | GATGGCAGTGTCTTATCCAA                |
| <i>M. canetti</i> sp probe  | <i>M. canetti</i> specific probe                                  | ROX-TGAGAGGTGTTGGCACGCAA-BHQ2       |
| <i>lpqT</i> Fw              | Forward sequencing primer, Forward real-time PCR assay primer     | ACGAATCCGGCGATGATC                  |
| <i>lpqT</i> _Rv             | Reverse sequencing primer, Reverse real-time PCR assay primer     | CGACTGCACACCTGGAA                   |
| <i>lpqT</i> probe           | <i>lpqT</i> Probe                                                 | FAM-TTGGCCGGCGCCGGTT-BHQ1           |
| RD1_Fw                      | Forward sequencing primer, Forward real-time PCR assay primer     | CATCGCTGATGTGCTTGC                  |
| RD1_Rv                      | Reverse sequencing primer, Reverse real-time PCR assay primer     | TGCGCCGAGCTGTATTC                   |
| RD1_probe                   | RD1 Probe                                                         | ROX-ACACTAGCGTCAATGCGGTCA-BHQ2      |
| <i>M. caprae lepA</i> _Fw   | Forward sequencing primer, Forward real-time PCR assay primer     | AGACCGTGCGGATCTTG                   |
| <i>M. caprae lepA</i> _Rv   | Reverse sequencing primer, Reverse real-time PCR assay primer     | CATGGAGATCACCCGTGA                  |
| <i>M. caprae lepA</i> probe | <i>M. caprae lepA</i> Probe                                       | Cyan 500-TATCGGGTACACAAAGACGA – BBQ |
| RD713_Fw S                  | RD713 Forward sequencing primer                                   | CCATCTGCGCTTTCGGTGCTTCT             |
| RD713_RvS                   | RD 713 Reverse sequencing primer                                  | CTGCCAGTCGCTTCCCCATTGTG             |

|                      |                                                               |                                   |
|----------------------|---------------------------------------------------------------|-----------------------------------|
| RD713_Fw             | Forward real-time PCR assay primer                            | ACGGAACGGTCAAGAAC                 |
| RD713_Rv             | Reverse real-time PCR assay primer                            | GCTCAAGAATCGTCGCTA                |
| RD713 probe          | RD 713 Probe                                                  | Cyan 500-ACGTCCTTGTGACCGCGAC- BBQ |
| RD701_FwS            | RD 701 Forward sequencing primer                              | CTGTGCAGGTGGTCGTTTC               |
| RD701_RvS            | RD 701 Reverse sequencing primer                              | CGAATTGCTCATCCCGTAAC              |
| RD701_Fw             | Forward real-time PCR assay primer                            | AACGGGTCCGATTCTCC                 |
| RD701_Rv             | Reverse real-time PCR assay primer                            | CCGAAACCCTCGTTGATC                |
| RD701 probe          | RD 701 Probe                                                  | ROX-TCAGCCGCCGGCCAACC-BHQ2        |
| IAC MSMEG_0660_Fw    | Forward sequencing primer, Forward real-time PCR assay primer | TCACCGACCATGTCCAG                 |
| IAC MSMEG_0660_Rv    | Reverse sequencing primer, Reverse real-time PCR assay primer | CGTTGCCCAATCCGTATG                |
| IAC MSMEG_0660 probe | IAC MSMEG_0660 probe                                          | Cy5-CAGCAGTACCATCGCCATCG-BHQ2     |
| <i>ssrA</i> _Fw      | <i>ssrA</i> Forward sequencing primer                         | TGGGGCTGAAAGGTTTCGA               |
| <i>ssrA</i> _Rv      | <i>ssrA</i> Reverse sequencing primer                         | TGGAGCTGCCGGAAT                   |

17  
18  
19  
20  
21  
22  
23  
24  
25  
26  
27  
28  
29  
30  
31  
32  
33  
34  
35  
36  
37  
38  
39  
40  
41  
42  
43  
44  
45  
46  
47  
48  
49

50  
51  
52  
53  
54

**Fig. S1A**

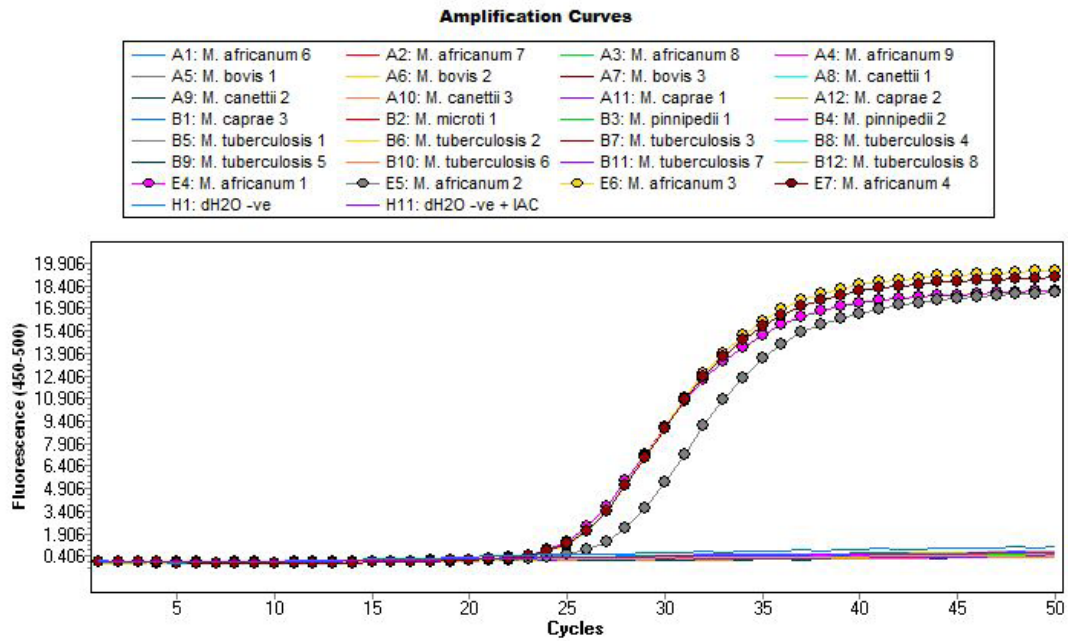

55  
56  
57  
58  
59  
60  
61  
62  
63

**Fig. S1B**

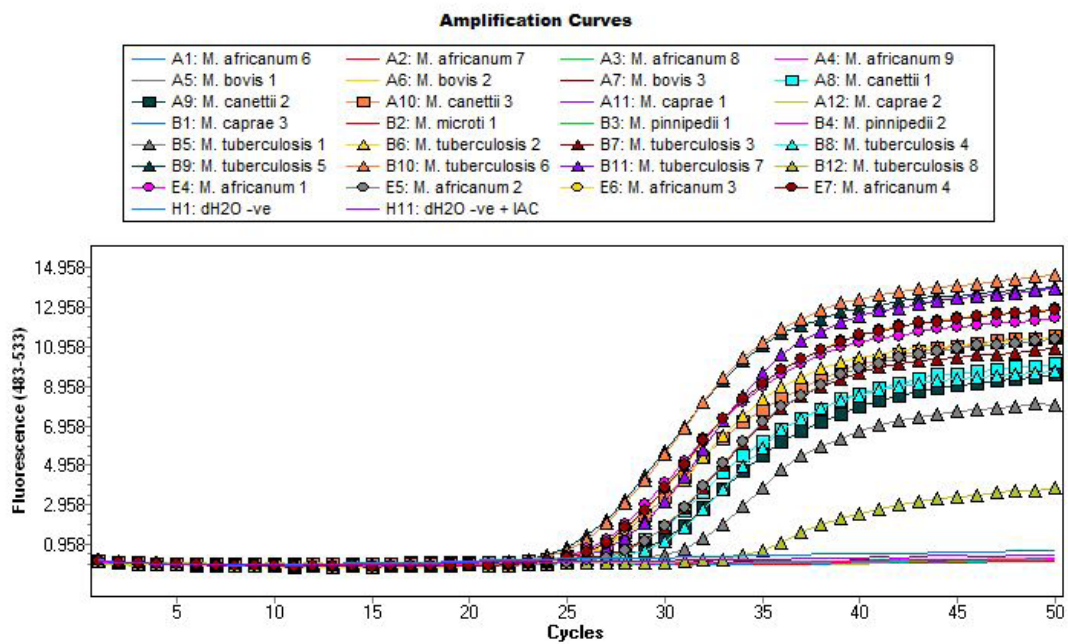

64  
65  
66  
67

68  
69  
70  
71

Fig. S1C

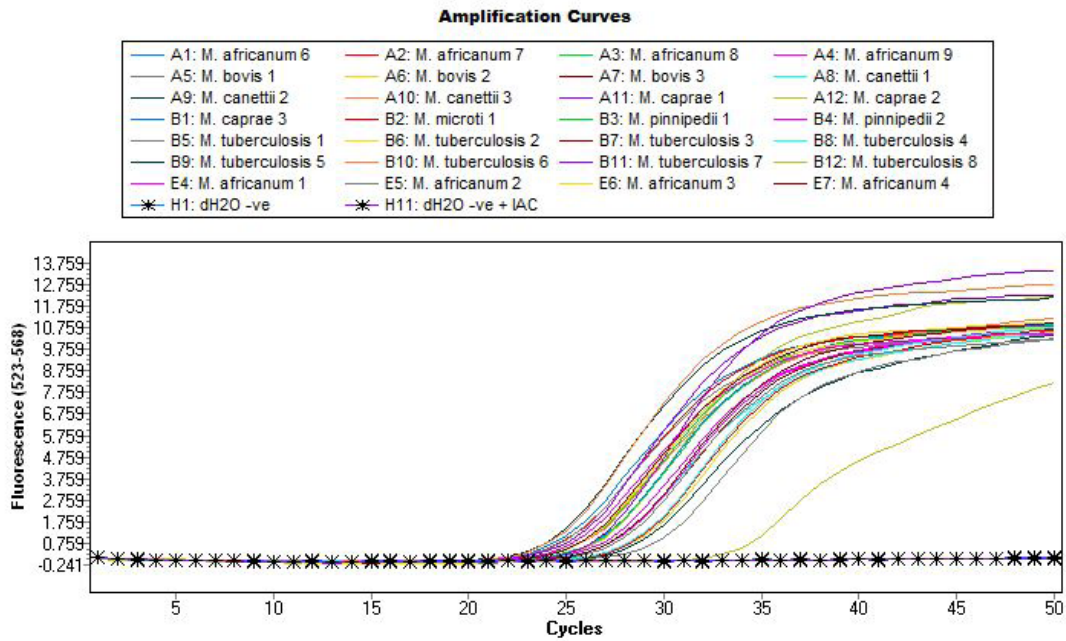

72  
73  
74  
75  
76  
77

Fig. S1D

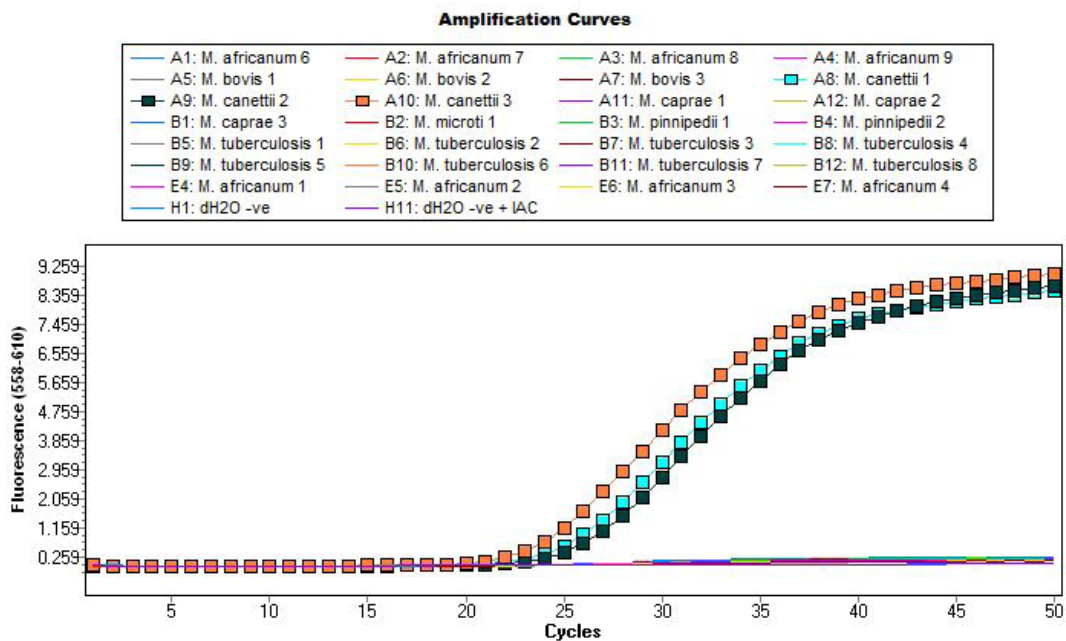

78  
79  
80  
81  
82  
83  
84  
85  
86



87  
88  
89  
90  
91  
92  
93

**Fig. S1E**

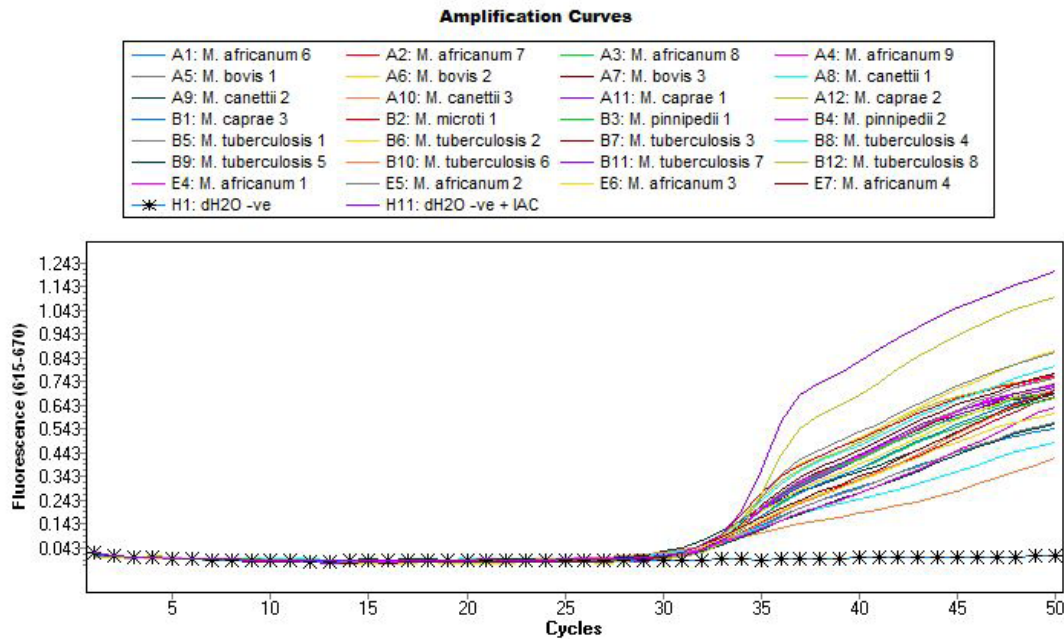

94  
95  
96

**Supplementary Figure Legend**

97 **Fig. S1**

98

99 **Amplification curves for multiplex 1 real-time PCR assay**

100

101 Figure S1A Real-time amplification curves for *M. africanum* West African 1 (circle) using  
102 RD713 in Cyan500 channel (450-500). Figure S1B Amplification curves for *M. africanum*  
103 West African 1 (circle), *M. tuberculosis* (triangles) and *M. canettii* (rectangles) using the  
104 *wbb11* gene in FAM channel (483-533). Figure S1C Amplification curves for all members of  
105 the MTC using the *lepA* gene, with the no template control highlighted (stars) in the HEX  
106 channel (523-568). Figure S1D Amplification curves of *M. canettii* (rectangles) in the ROX  
107 channel (558-610) using RD<sup>canettii1</sup>. Figure S1E Amplification curves for IAC in Cy5 channel  
108 (615-670) with the no template control highlighted with stars through amplification curve.

109  
110

111  
112  
113  
114  
115

**Fig. S2A**

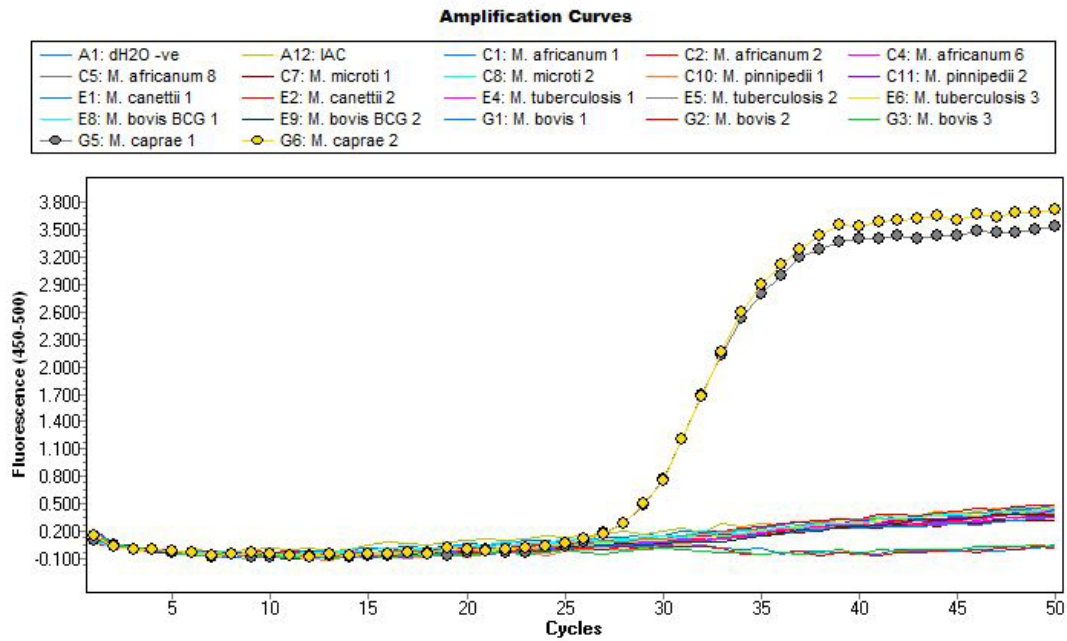

116  
117  
118  
119  
120  
121  
122  
123

**Fig. S2B**

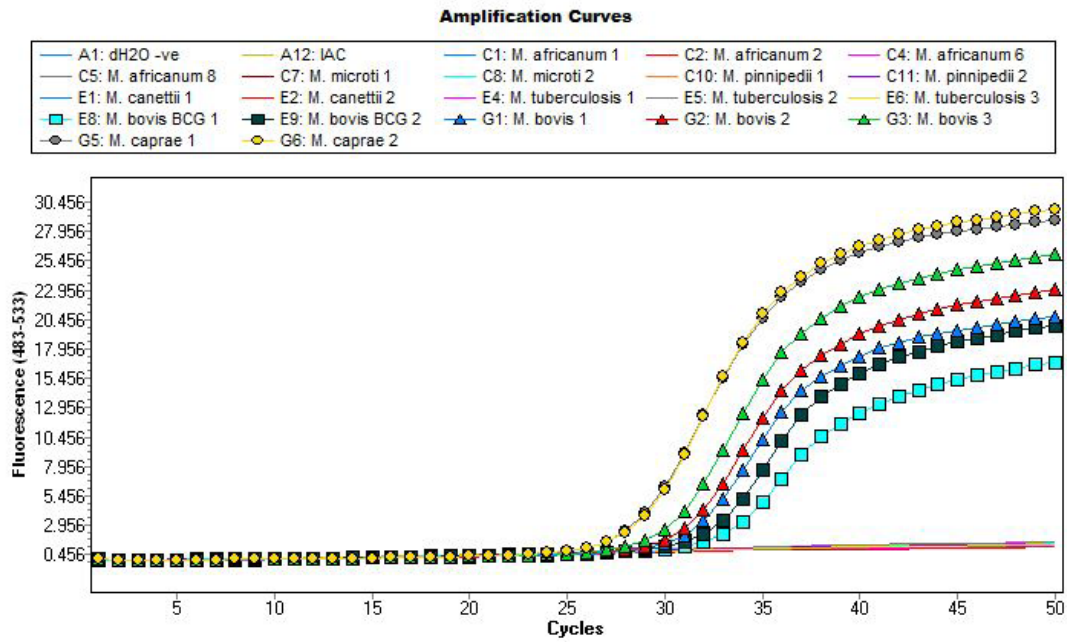

124  
125  
126  
127  
128

129  
130  
131  
132  
133

**Fig. S2C**

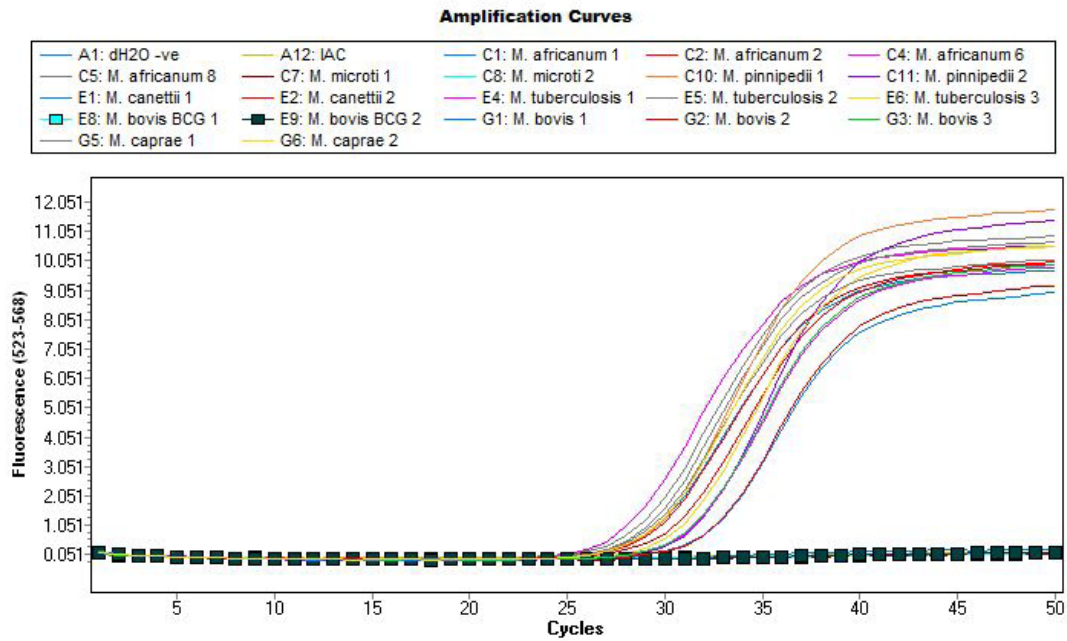

134  
135  
136  
137  
138  
139

**Fig. S2D**

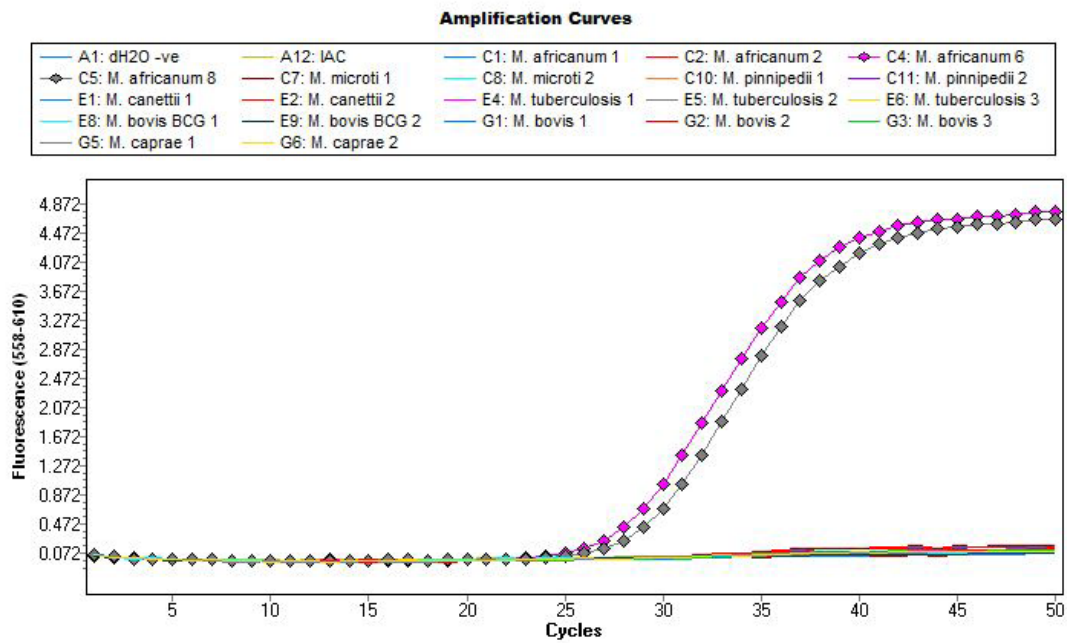

140  
141  
142  
143  
144  
145  
146

147  
148  
149  
150  
151

**Fig. S2 E**

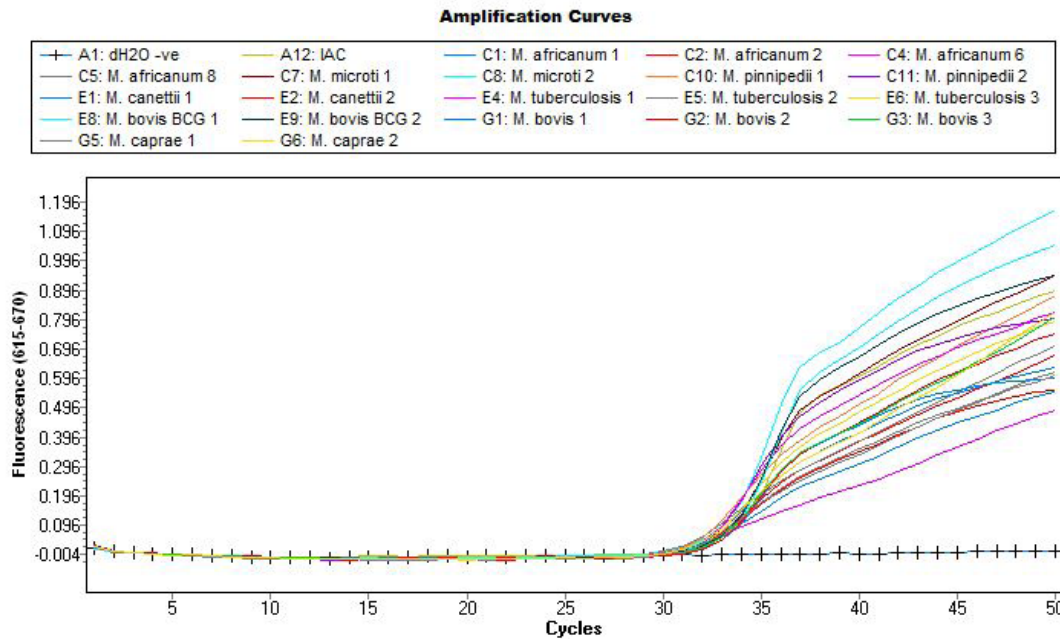

152  
153  
154  
155  
156  
157  
158  
159

**Fig. S2**

**Amplification curves for multiplex 2 real-time PCR assay**

160 Figure S2A Real-time amplification curves for *M. caprae* (circle) using *lepA* gene in  
161 Cyan500 channel (450-500). Figure S2B Amplification curves for *M. caprae* (circle), *M.*  
162 *bovis* (triangles) and *M. bovis BCG* (rectangles) using the *lpqT* gene in FAM channel (483-  
163 533). Figure S2C Amplification curves for all members of the MTC with the exception of *M.*  
164 *bovis BCG* (diamonds) and *M. microti* in the HEX channel (523-568). Figure S2D  
165 Amplification curves of *M. africanum* West African 2 (diamonds) in the ROX channel (558-  
166 610) using RD701. Figure S2E Amplification curves for IAC in Cy5 channel (615-670) with  
167 the no template control highlighted with stars through amplification curve.

168
